# Supplementary material for: Defect healingviaa gradient cooling strategy for efficient all-inorganic perovskite solar cells
Source: Royal Society of Chemistry journal article supplement (doi:10.1039/d1tc05963g), 2022-01-01
Supplement: d1tc05963g1.pdf [file d1tc05963g1.pdf]

## Supporting Information

### Defect healing via a gradient cooling strategy for efficient all-inorganic perovskite solar cells

Jiani Lv, Wenning Zhao, Wenhui Li\*, Jiatao Yu, Mingzhe Zhang, Xiuxun Han\* and Tooru Tanaka

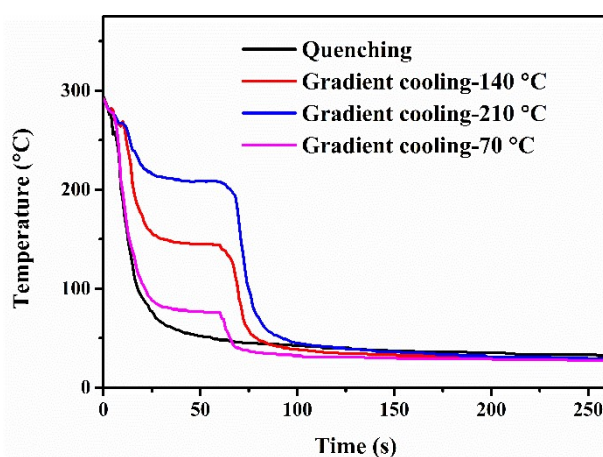

**Figure S1.** Cooling curves of quenching and gradient cooling processes.

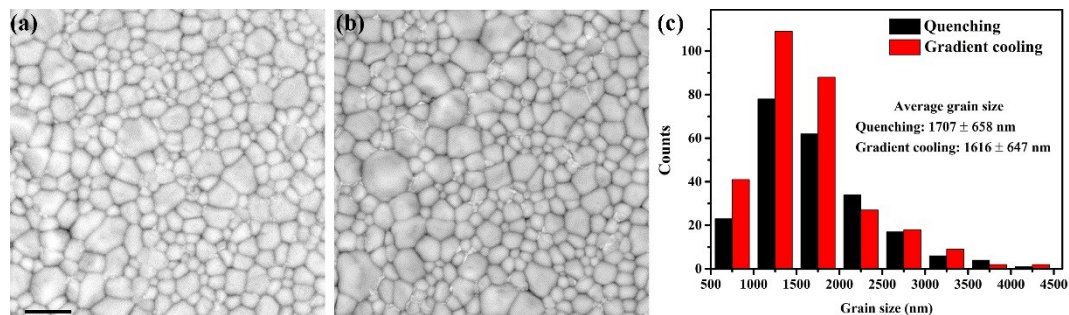

**Figure S2.** Top view SEM images of the quenching film (a) and gradient cooling film (b). The scale bar is 2  $\mu\text{m}$ . (c) Grain size distribution histograms of perovskite films prepared by different cooling processes.

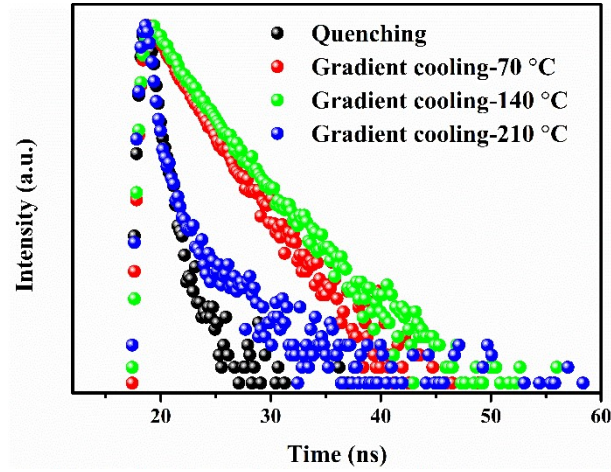

**Figure S3.** PL decay curves of perovskite films obtained from different cooling processes. The substrate was glass.

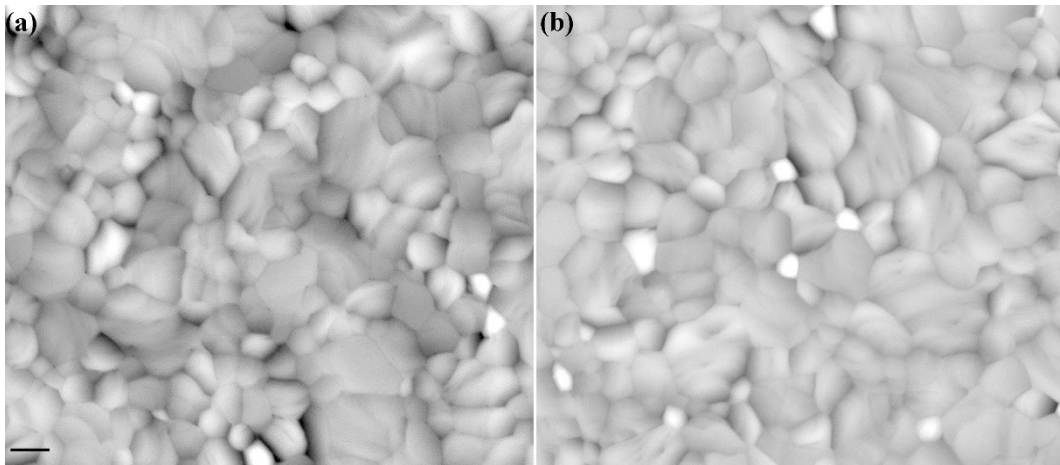

**Figure S4.** Top-view SEM images of perovskite films on the glass substrates. (a) The quenching film. (b) The gradient cooling film. The scale bar is 2  $\mu\text{m}$ .

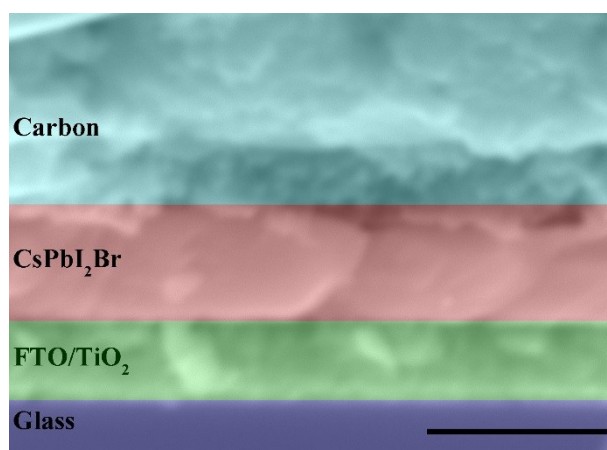

**Figure S5.** Cross-sectional SEM image of the device. The scale bar is 1  $\mu\text{m}$ .

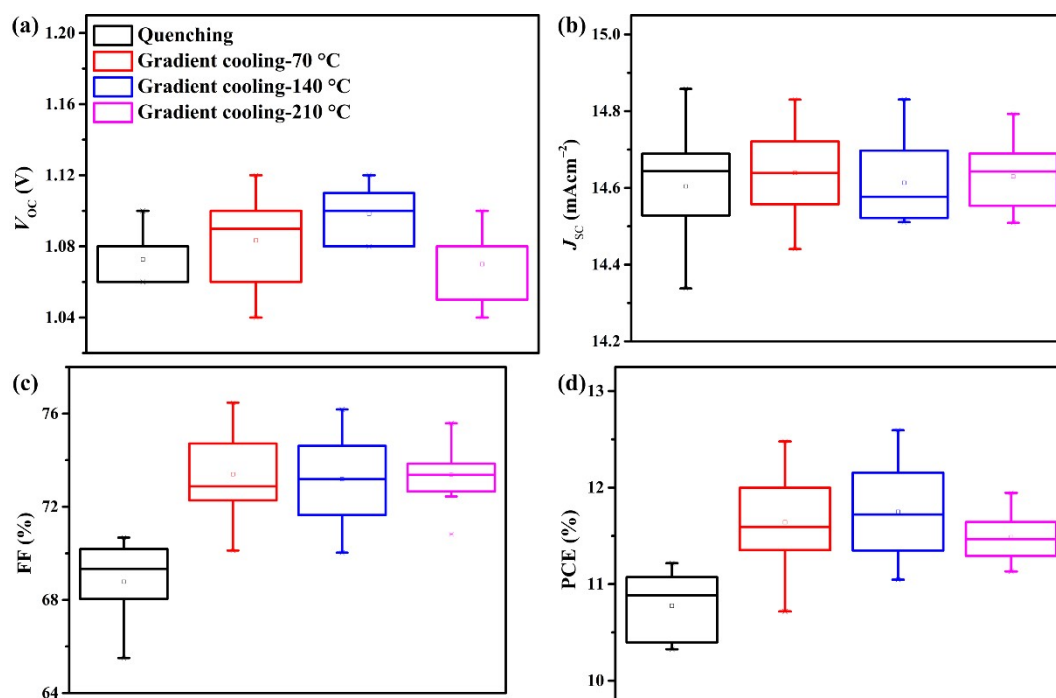

**Figure S6.** Box charts of photovoltaic parameters obtained from devices under different cooling conditions. (a)  $V_{oc}$ ; (b)  $J_{sc}$ ; (c) FF; (d) PCE.

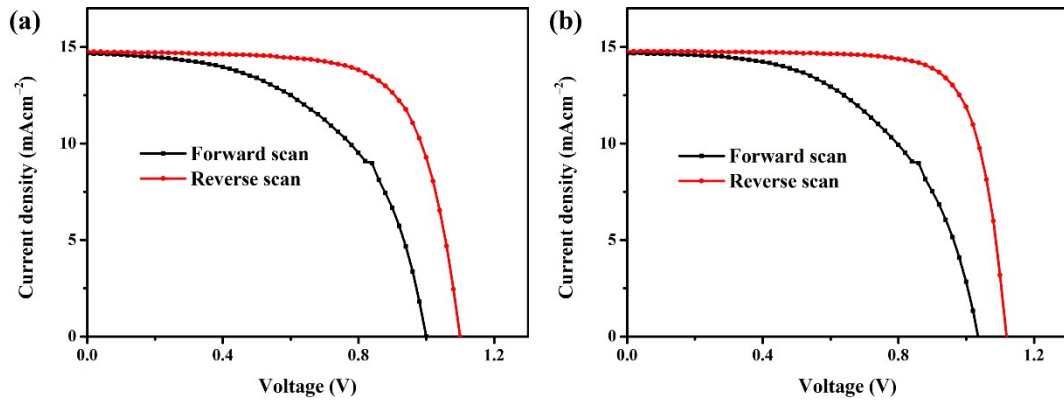

**Figure S7.**  $J$ - $V$  curves under forward and reverse scanning for champion devices using quenching process (a) and gradient cooling process (b).

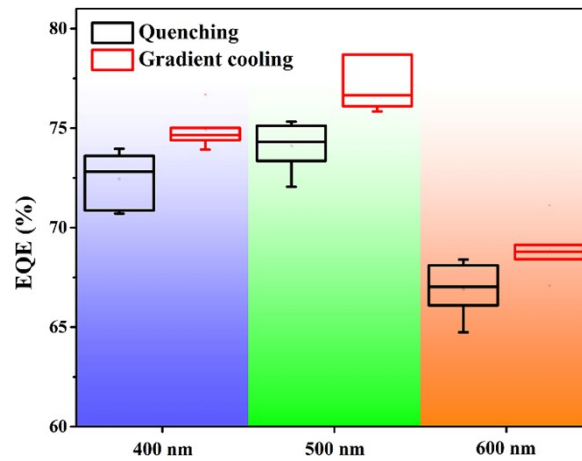

**Figure S8.** Statistical distribution of EQE values at three typical wavelengths (400 nm, 500 nm, and 600 nm).

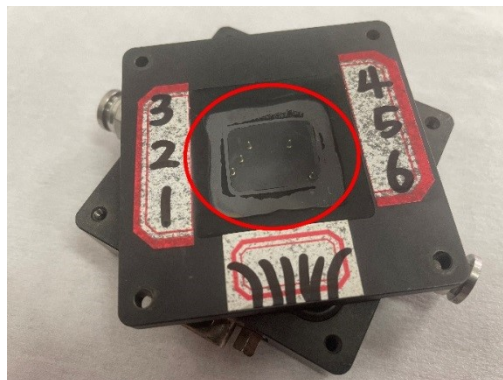

**Figure S9.** Optical photograph of test fixture for EQE measurement. The part in the red circle is the capping glass.

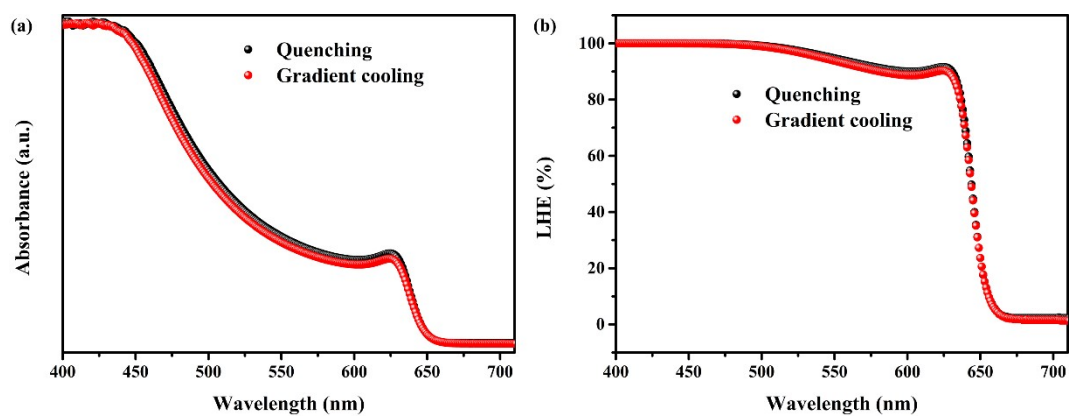

**Figure S10.** Absorption spectra (a) and corresponding LHE spectra (b) of perovskite films.

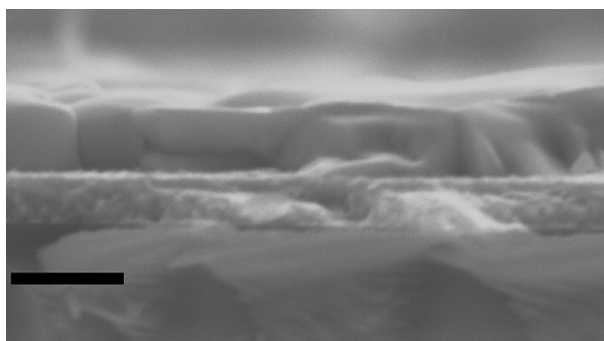

**Figure S11.** Cross-sectional SEM image of thick perovskite film. The scale bar is 1  $\mu\text{m}$ .

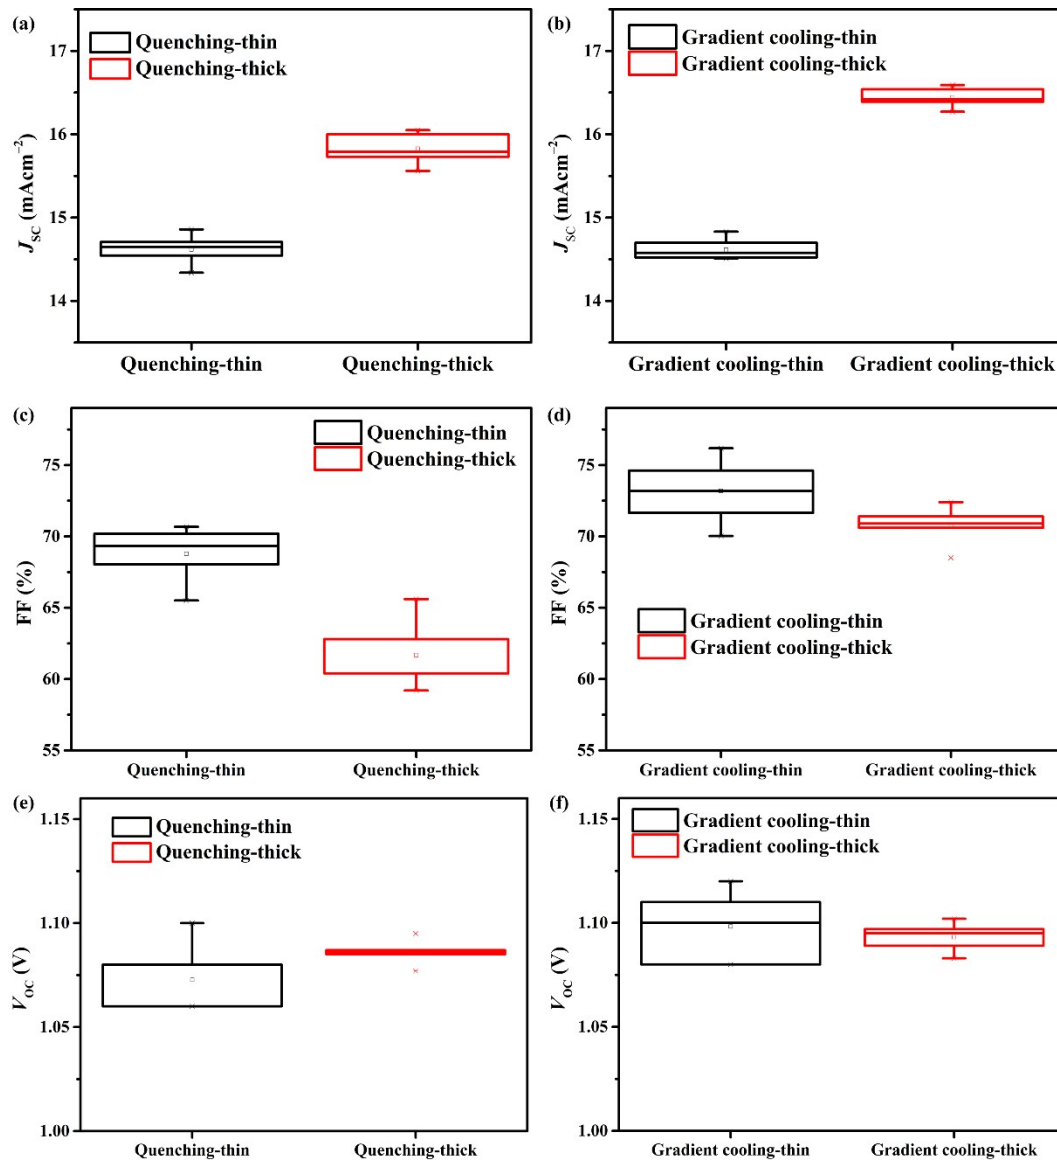

**Figure S12.** Comparison of photovoltaic parameters between thin and thick perovskite films. (a, b)  $J_{sc}$ ; (c, d) FF; (e, f)  $V_{oc}$ .

**Table S1.** TRPL fitting parameters of CsPbI<sub>2</sub>Br films fabricated on different substrates.

| Samples                 | Substrates           | $A_1$<br>[%] | $\tau_1$<br>[ns] | $A_2$<br>[%] | $\tau_2$<br>[ns] | $\tau_{ave}$<br>[ns] |
|-------------------------|----------------------|--------------|------------------|--------------|------------------|----------------------|
| Quenching               | glass                | 90.9         | 0.50             | 9.1          | 1.55             | 0.75                 |
|                         | FTO/TiO <sub>2</sub> | 64.4         | 5.93             | 35.6         | 13.61            | 10.23                |
| Gradient cooling-140 °C | glass                | 80.7         | 2.80             | 19.3         | 5.78             | 3.78                 |
|                         | FTO/TiO <sub>2</sub> | 89.9         | 0.30             | 10.1         | 1.59             | 0.79                 |
| Gradient cooling-210 °C | glass                | 95.5         | 0.48             | 4.5          | 3.48             | 1.25                 |
| Gradient cooling-70 °C  | glass                | 80.6         | 2.38             | 19.4         | 4.82             | 3.18                 |

**Table S2.** Photovoltaic parameters of devices obtained from different cooling processes.

| Devices                 |         | $J_{sc}$<br>[mAcm <sup>-2</sup> ] | $V_{oc}$<br>[V] | FF<br>[%]  | PCE<br>[%] |
|-------------------------|---------|-----------------------------------|-----------------|------------|------------|
| Quenching               | average | 14.62±0.15                        | 1.07±0.02       | 68.91±1.67 | 10.83±0.38 |
|                         | best    | 14.77                             | 1.10            | 70.30      | 11.42      |
| Gradient cooling-70 °C  | average | 14.64±0.12                        | 1.08±0.02       | 73.39±1.83 | 11.64±0.46 |
|                         | best    | 14.64                             | 1.12            | 76.11      | 12.48      |
| Gradient cooling-140 °C | average | 14.61±0.11                        | 1.10±0.02       | 73.19±1.92 | 11.75±0.47 |
|                         | best    | 14.76                             | 1.12            | 76.18      | 12.59      |
| Gradient cooling-210 °C | average | 14.63±0.09                        | 1.07±0.02       | 73.39±1.30 | 11.49±0.27 |
|                         | best    | 14.69                             | 1.10            | 73.93      | 11.95      |

**Table S3.** EIS fitting parameters.

| Devices          | $R_S$<br>[ $\Omega$ ] | $R_{CT}$<br>[ $\Omega$ ] | $R_{rec}$<br>[ $\Omega$ ] | $CPE-T_1$<br>[F]      | $CPE-T_2$<br>[F]      |
|------------------|-----------------------|--------------------------|---------------------------|-----------------------|-----------------------|
| Quenching        | 29.89                 | 413                      | 1188                      | $1.38 \times 10^{-8}$ | $1.12 \times 10^{-9}$ |
| Gradient cooling | 26.42                 | 310.7                    | 9696                      | $3.54 \times 10^{-8}$ | $4.03 \times 10^{-9}$ |

**Table S4.** Photovoltaic parameters of thick devices.

| Devices          |         | $J_{SC}$<br>[mAcm <sup>-2</sup> ] | $V_{OC}$<br>[V] | FF<br>[%]  | PCE<br>[%] |
|------------------|---------|-----------------------------------|-----------------|------------|------------|
| Quenching        | average | 15.83±0.20                        | 1.09±0.01       | 61.68±2.55 | 10.60±0.56 |
|                  | best    | 16.00                             | 1.10            | 65.60      | 11.49      |
| Gradient cooling | average | 16.44±0.13                        | 1.09±0.01       | 70.76±1.44 | 12.72±0.34 |
|                  | best    | 16.59                             | 1.09            | 72.40      | 13.07      |

**Table S5.** Summary of PCEs for CsPbI<sub>2</sub>Br based C-PSCs.

| Device structure                                                                                     | PCE<br>[%] | Ref. |
|------------------------------------------------------------------------------------------------------|------------|------|
| FTO/c-TiO <sub>2</sub> /CsPbI <sub>2</sub> Br (MABr top-seeded)/C                                    | 14.84      | [1]  |
| ITO/TiO <sub>2</sub> /CsPbI <sub>2</sub> Br/ATHPBr/C                                                 | 14.50      | [2]  |
| FTO/c-TiO <sub>2</sub> /m-TiO <sub>2</sub> /CsPbI <sub>2</sub> Br-CdSe QD/C                          | 14.49      | [3]  |
| FTO/ TiCl <sub>4</sub> -TiCl <sub>3</sub> modified c-TiO <sub>2</sub> /CsPbI <sub>2</sub> Br/C       | 14.46      | [4]  |
| FTO/TiO <sub>2</sub> /CsPbI <sub>2</sub> Br/ HTAB/C                                                  | 14.30      | [5]  |
| ITO/SnO <sub>2</sub> /SnCl <sub>2</sub> / CsPbI <sub>2</sub> Br/ BMIMBF <sub>4</sub> /C              | 14.03      | [6]  |
| ITO/SnO <sub>2</sub> /SnCl <sub>2</sub> / CsPbI <sub>2</sub> Br/ delta-2:2-bis (1,3-dithiazole) /C   | 13.78      | [7]  |
| ITO/SnO <sub>2</sub> /SnCl <sub>2</sub> / CsPbI <sub>2</sub> Br/ Cs <sub>2</sub> PtI <sub>6</sub> /C | 13.69      | [8]  |
| FTO/SnO <sub>2</sub> /CsPbI <sub>2</sub> Br-PANI/C                                                   | 13.52      | [9]  |



|                                                                                    |       |           |
|------------------------------------------------------------------------------------|-------|-----------|
| FTO/SnO <sub>2</sub> / CsPbI <sub>2</sub> Br /PEAI/C                               | 13.38 | [10]      |
| FTO/TiO <sub>2</sub> / CsPbI <sub>2</sub> Br (water-based spray-assisted growth)/C | 13.30 | [11]      |
| FTO/TiO <sub>2</sub> /CsPbI <sub>2</sub> Br/CuPc/C                                 | 13.16 | [12]      |
| FTO/c-TiO <sub>2</sub> /m-TiO <sub>2</sub> /CsPbI <sub>2</sub> Br/Carbon black/C   | 13.13 | [13]      |
| FTO/c-TiO <sub>2</sub> /CsPbI <sub>2</sub> Br-Mg(Ac) <sub>2</sub> /C               | 13.08 | [14]      |
| FTO/c-TiO <sub>2</sub> /CsPbI <sub>2</sub> Br (gradient cooling)/C                 | 13.07 | This work |
| FTO/TiO <sub>2</sub> /CsPbI <sub>2</sub> Br-excess PbI <sub>2</sub> /C             | 12.78 | [15]      |
| FTO/SnO <sub>2</sub> / CsPbI <sub>2</sub> Br-excess PbI <sub>2</sub> /C            | 12.19 | [16]      |

## References (Supporting Information)

- [1] Zhu, W.; Chai, W.; Chen, D.; Ma, J.; Chen, D.; Xi, H.; Zhang, J.; Zhang, C.; Hao, Y. High-Efficiency (>14%) and Air-Stable Carbon-Based, All-Inorganic CsPbI<sub>2</sub>Br Perovskite Solar Cells through a Top-Seeded Growth Strategy. *ACS Energy Lett.* **2021**, *6* (4), 1500-1510.
- [2] Yan, Z.; Wang, D.; Jing, Y.; Wang, X.; Zhang, H.; Liu, X.; Wang, S.; Wang, C.; Sun, W.; Wu, J.; Lan, Z. Surface Dipole Affords High-Performance Carbon-Based CsPbI<sub>2</sub>Br Perovskite Solar Cells. *Chem. Eng. J.* **2022**, *433*, 134611.
- [3] Xu, S.; Kang, C.; Huang, Z.; Zhang, Z.; Rao, H.; Pan, Z.; Zhong, X. Dual-Functional Quantum Dot Seeding Growth of High-Quality Air-Processed CsPbI<sub>2</sub>Br Film for Carbon-Based Perovskite Solar Cells. *Sol. RRL* **2022**, 2100989.
- [4] Wang, W.; Lin, Y.; Zhang, G.; Kang, C.; Pan, Z.; Zhong, X.; Rao, H. Modification of Compact TiO<sub>2</sub> Layer by TiCl<sub>4</sub>-TiCl<sub>3</sub> Mixture Treatment and Construction of High-

Efficiency Carbon-Based CsPbI<sub>2</sub>Br Perovskite Solar Cells. *J. Energ. Chem.* **2021**, *63*, 442-451.

[5] Zhang, G.; Xie, P.; Huang, Z.; Yang, Z.; Pan, Z.; Fang, Y.; Rao, H.; Zhong, X. Modification of Energy Level Alignment for Boosting Carbon-Based CsPbI<sub>2</sub>Br Solar Cells with 14% Certified Efficiency. *Adv. Funct. Mater.* **2021**, *31* (19), 2011187.

[6] Yu, F.; Han, Q.; Wang, L.; Yang, S.; Cai, X.; Zhang, C.; Ma, T. Surface Management for Carbon-Based CsPbI<sub>2</sub>Br Perovskite Solar Cell with 14% Power Conversion Efficiency. *Sol. RRL* **2021**, *5* (9), 2100404.

[7] Han, Q.; Yang, S.; Wang, L.; Yu, F.; Zhang, C.; Wu, M.; Ma, T. The Sulfur-Rich Small Molecule Boosts the Efficiency of Carbon-Based CsPbI<sub>2</sub>Br Perovskite Solar Cells to Approaching 14%. *Sol. Energy* **2021**, *216*, 351-357.

[8] Han, Q.; Yang, S.; Wang, L.; Yu, F.; Cai, X.; Ma, T. A Double Perovskite Participation for Promoting Stability and Performance of Carbon-Based CsPbI<sub>2</sub>Br Perovskite Solar Cells. *J. Colloid Interface Sci.* **2022**, *606*, 800-807.

[9] Liu, C.; He, J.; Wu, M.; Wu, Y.; Du, P.; Fan, L.; Zhang, Q.; Wang, D.; Zhang, T. All-Inorganic CsPbI<sub>2</sub>Br Perovskite Solar Cell with Open-Circuit Voltage over 1.3 V by Balancing Electron and Hole Transport. *Sol. RRL* **2020**, *4* (7), 2000016.

[10] Zhang, Z.; Ba, Y.; Chen, D.; Ma, J.; Zhu, W.; Xi, H.; Chen, D.; Zhang, J.; Zhang, C.; Hao, Y. Generic Water-Based Spray-Assisted Growth for Scalable High-Efficiency Carbon-Electrode All-Inorganic Perovskite Solar Cells. *iScience* **2021**, *24* (11), 103365.

- [11] Xie, P.; Zhang, G.; Yang, Z.; Pan, Z.; Fang, Y.; Rao, H.; Zhong, X. Perovskite-Compatible Carbon Electrode Improving the Efficiency and Stability of CsPbI<sub>2</sub>Br Solar Cells. *Sol. RRL* **2020**, *4* (11), 2000431.
- [12] Gong, S.; Li, H.; Chen, Z.; Shou, C.; Huang, M.; Yang, S. CsPbI<sub>2</sub>Br Perovskite Solar Cells Based on Carbon Black-Containing Counter Electrodes. *ACS Appl. Mater. Interfaces* **2020**, *12* (31), 34882-34889.
- [13] Zhang, K.; Li, W.; Yu, J.; Han, X. Magnesium Acetate Additive Enables Efficient and Stable Carbon Electrode Based CsPbI<sub>2</sub>Br Perovskite Solar Cells. *Sol. Energy* **2021**, *222*, 186-192.
- [14] Wang, K.; You, T.; Yin, R.; Fan, B.; Liu, J.; Cui, S.; Chen, H.; Yin, P. Precise Nucleation Regulation and Defect Passivation for Highly Efficient and Stable Carbon-Based CsPbI<sub>2</sub>Br Perovskite Solar Cells. *ACS Appl. Energy Mater.* **2021**, *4* (4), 3508-3517.
- [15] Liu, C.; Wu, M.; Wu, Y.; Wang, D.; Zhang, T. Efficient All-Inorganic CsPbI<sub>2</sub>Br Perovskite Solar Cell with Carbon Electrode by Revealing Crystallization Kinetics and Improving Crystal Quality. *J. Power Sources* **2020**, *447*, 227389.
- [16] Wu, Y.; Zhang, Q.; Fan, L.; Liu, C.; Wu, M.; Wang, D.; Zhang, T. Surface Reconstruction-Induced Efficient CsPbI<sub>2</sub>Br Perovskite Solar Cell Using Phenylethylammonium Iodide. *ACS Appl. Energy Mater.* **2021**, *4* (6), 5583-5589.
